# Supplementary material for: Three-Dimensional Biofilm Electrode Reactors with a Triple-Layer Particle Electrode for Highly Efficient Treatment of Micro-Polluted Water Sources
Source: MDPI journal article supplement (doi:10.3390/w15101833), 2023-05-11
Supplement: s1 [file s1]

# Supplementary Materials

Table S1 Bacterial diversity indices

| Sample | Sequence<br>Number | Phylum | Class | Order | Family | Genus | 0.97 |           |          |         |         |
|--------|--------------------|--------|-------|-------|--------|-------|------|-----------|----------|---------|---------|
|        |                    |        |       |       |        |       | OTUs | chao      | coverage | shannon | simpson |
| AHA    | 41223              | 33     | 83    | 177   | 276    | 475   | 1184 | 1331.3793 | 0.9953   | 7.6716  | 0.0163  |
| AHC    | 58354              | 31     | 67    | 144   | 239    | 420   | 936  | 1174.8447 | 0.9966   | 5.4704  | 0.0794  |
| ATA    | 50533              | 42     | 95    | 196   | 311    | 505   | 1262 | 1462.6117 | 0.9961   | 7.7820  | 0.0156  |
| ATC    | 48495              | 36     | 88    | 177   | 288    | 462   | 906  | 1053.0059 | 0.9966   | 5.2834  | 0.0942  |
| BH     | 50936              | 27     | 59    | 129   | 203    | 678   | 710  | 830.2448  | 0.9977   | 6.7376  | 0.0248  |
| BT     | 33502              | 22     | 57    | 116   | 184    | 309   | 559  | 646.2142  | 0.9967   | 5.9836  | 0.0455  |
